# Supplementary material
Source: PubMed Central journal article supplement (PMC122642)

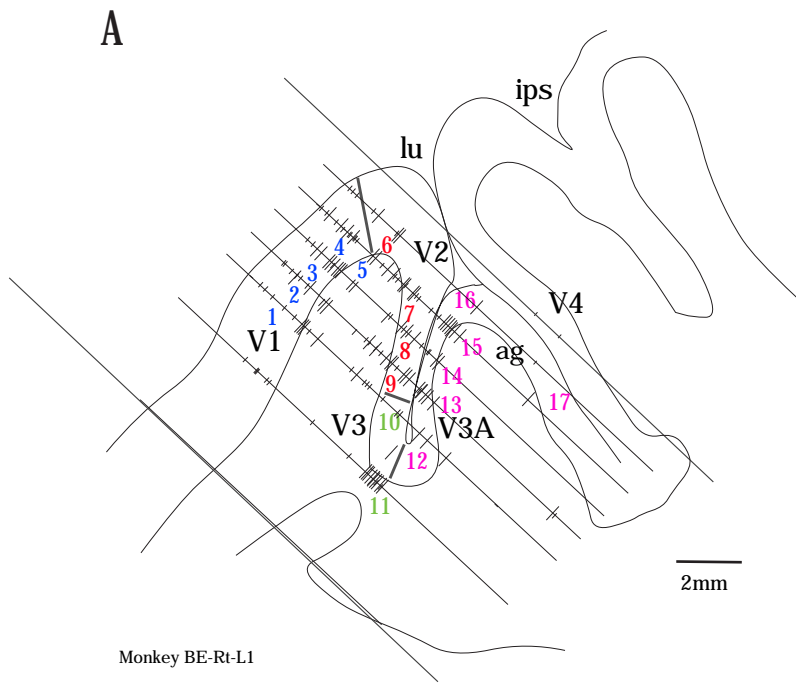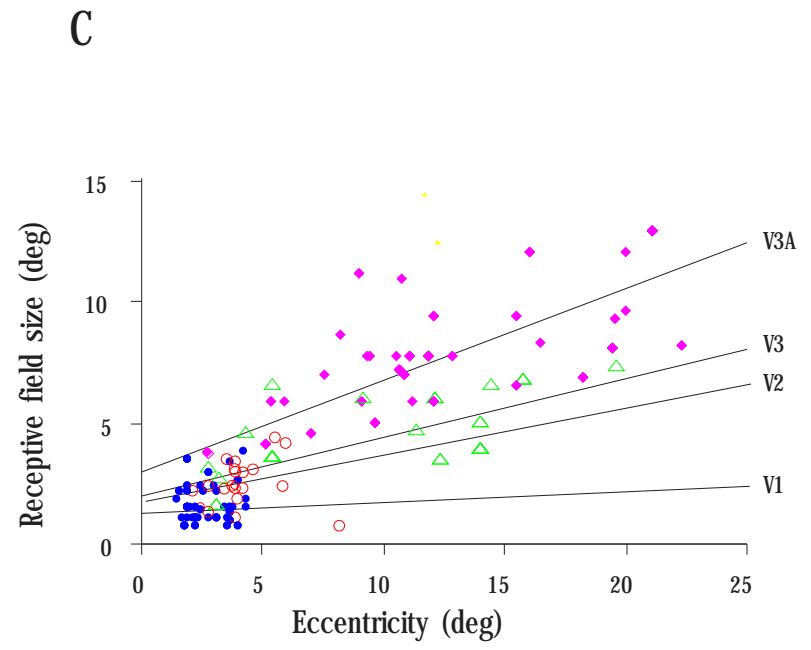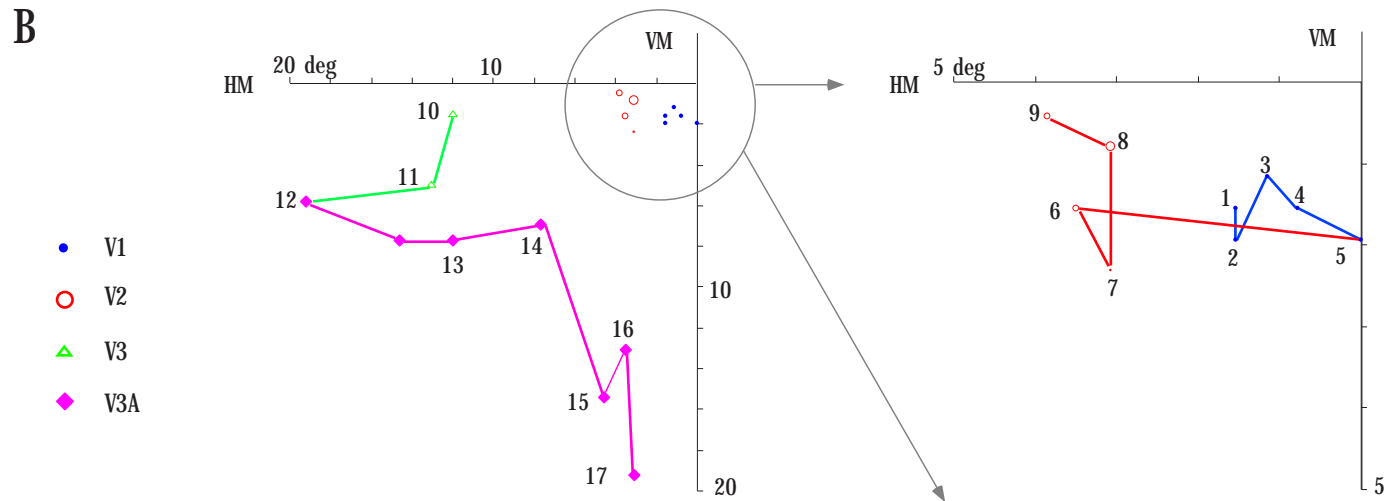

Supplement: pnas_99_6_4026__2.pdf [file pnas_99_6_4026__2.pdf]
